# Supplementary material for: Influence of biomaterial nanotopography on the adhesive and elastic properties of Staphylococcus aureus cells
Source: Royal Society of Chemistry journal article supplement (doi:10.1039/c6ra12504b), 2016-01-01
Supplement: c6ra12504b1.pdf [file c6ra12504b1.pdf]

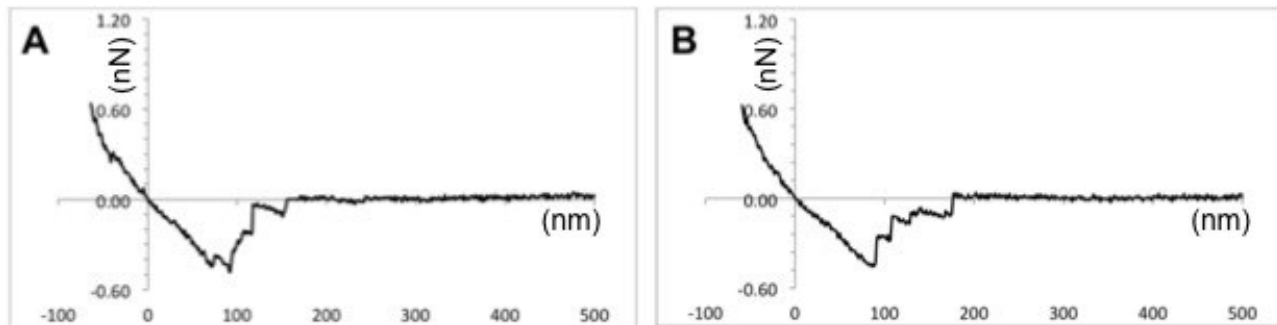

**Supplementary Figure 1:** Comparison between force curves obtained (A) at the beginning and (B) at the end of an experiment with the same bacterial probe and the SQ surface, after recording ~200 force-curves. Note that no substantial changes are observed, and force-curve architecture is mostly conserved after experimentation.
